# Supplementary material
Source: PubMed Central journal article supplement (PMC1061516)

**A**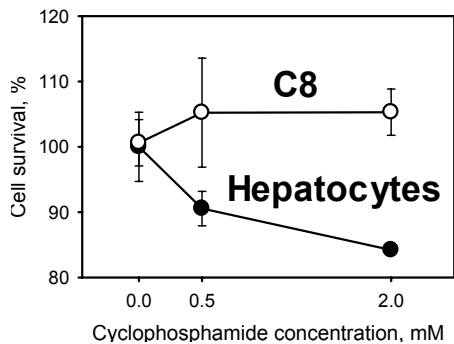**B**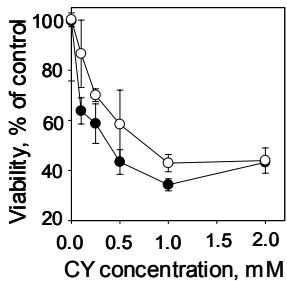**C**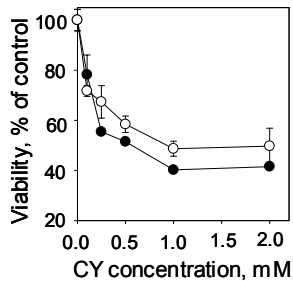

Supplement: pnas_102_9_3407__2.pdf [file pnas_102_9_3407__2.pdf]

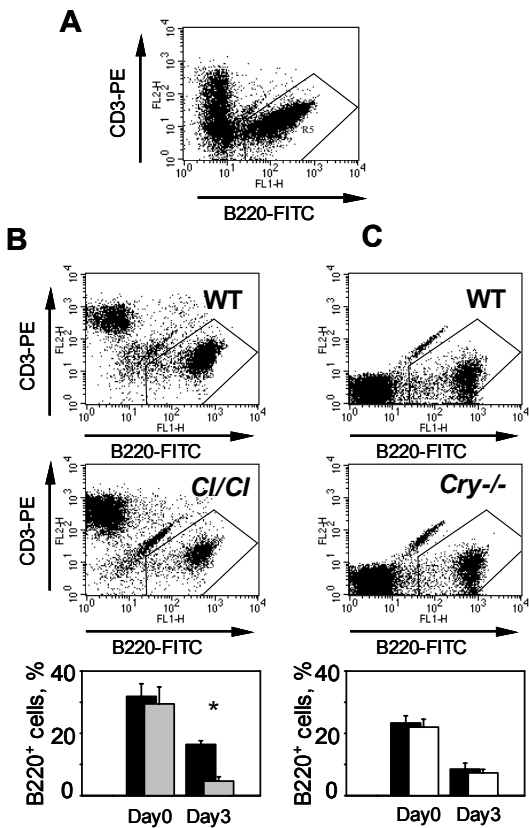

Supplement: pnas_102_9_3407__3.pdf [file pnas_102_9_3407__3.pdf]
